# Supplementary material for: ctDNA and residual cancer burden are prognostic in triple-negative breast cancer patients with residual disease
Source: PubMed Central journal article supplement (PMC9988835; doi:10.1038/s41523-023-00512-7), 2023-03-06
Supplement: 41523_2023_512_MOESM2_ESM.pdf [file 41523_2023_512_MOESM2_ESM.pdf]

# Supplementary Figure 1

a

## REMARK Diagram

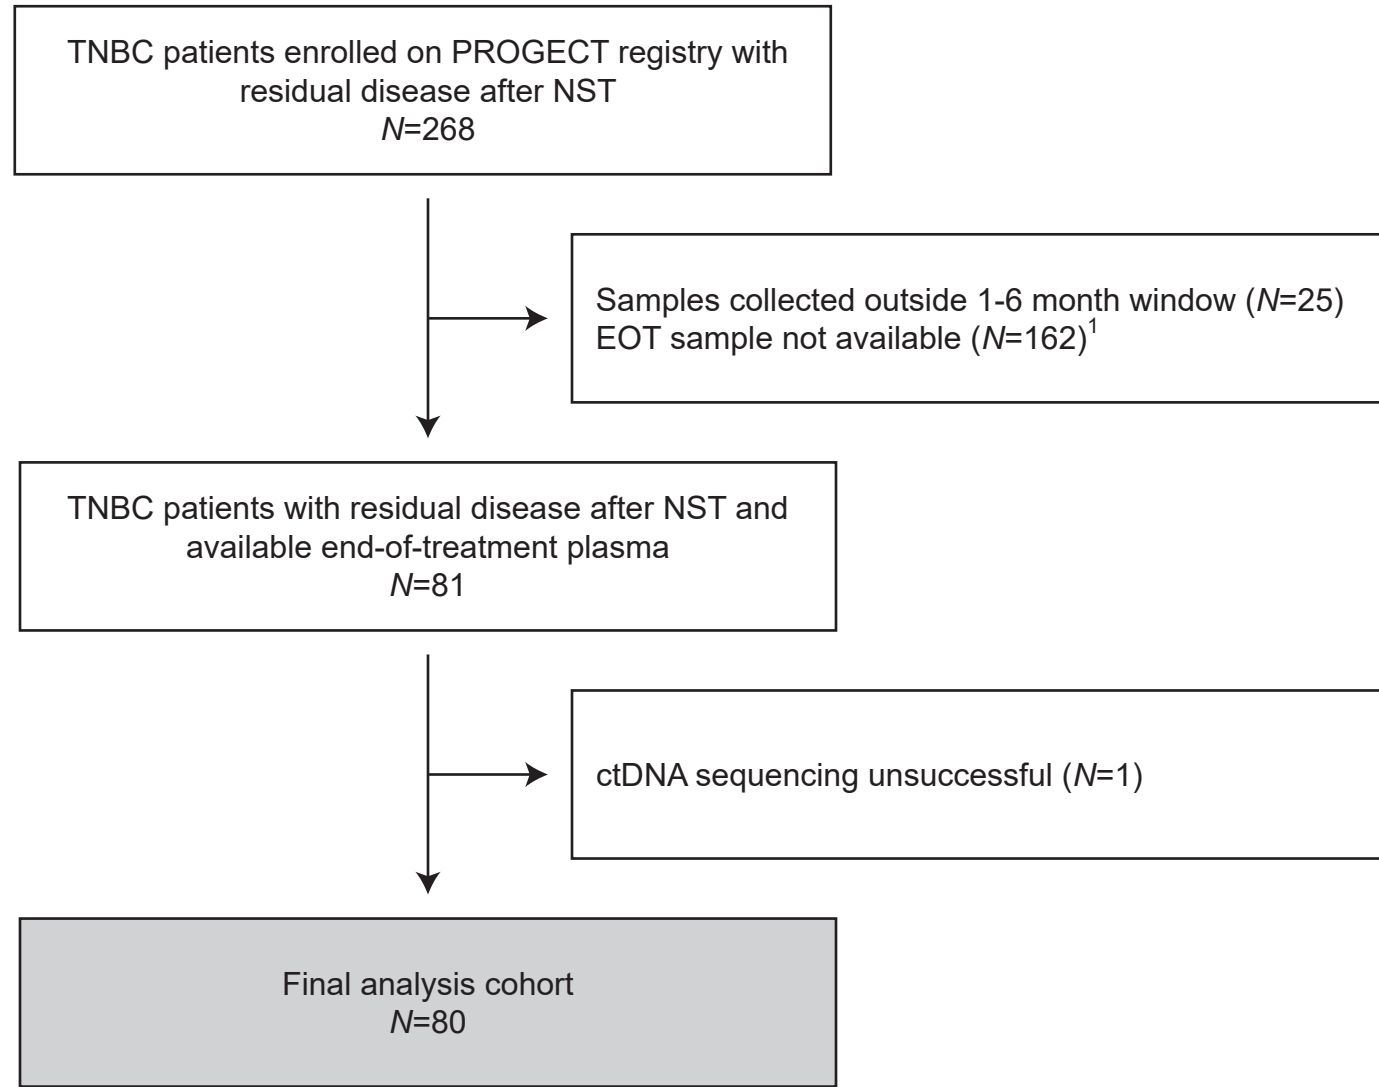

<sup>1</sup>EOT blood sample collection was optional (patient decision) during the initial years of the PROTECT registry. Protocol was amended in 2016 for EOT sample collection to be a standard part of PROTECT biospecimen collections.

Abbreviations: TNBC, triple-negative breast cancer; NST, neoadjuvant systemic therapy; EOT, end-of-treatment; ctDNA, cell-free circulating tumor DNA.

b

## ctDNA Positivity by VAF Threshold

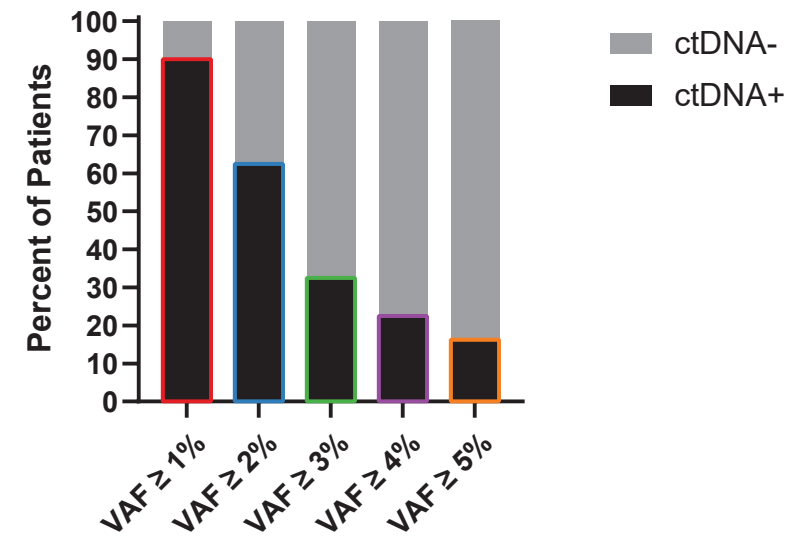

c

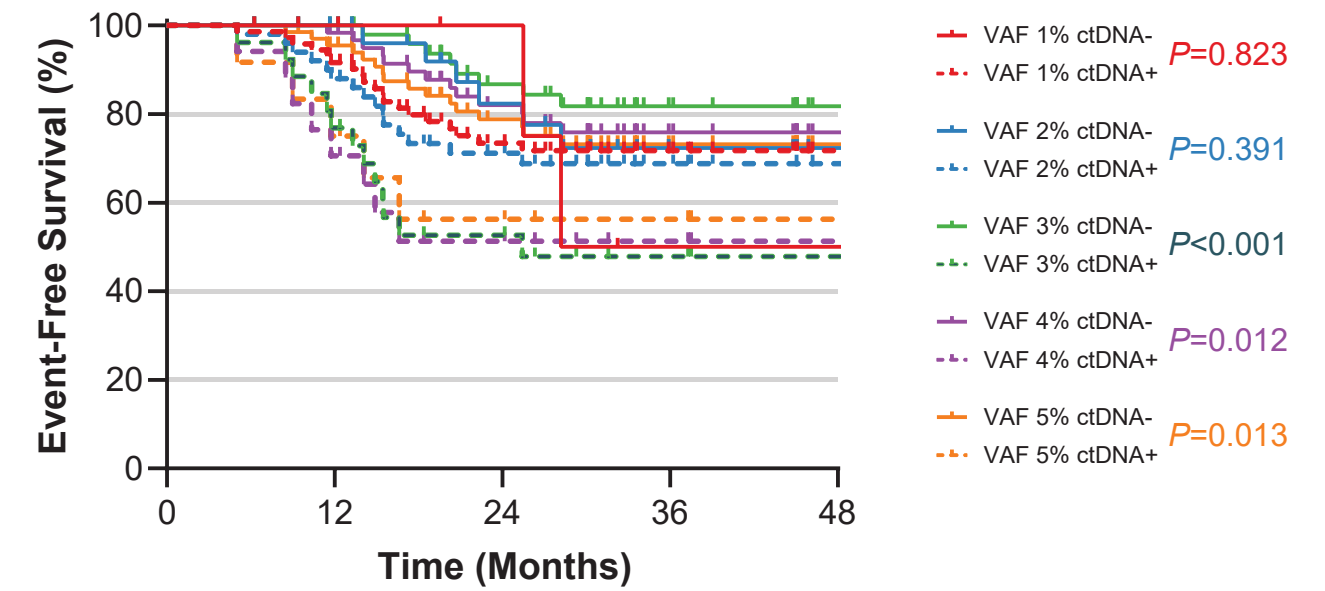

d

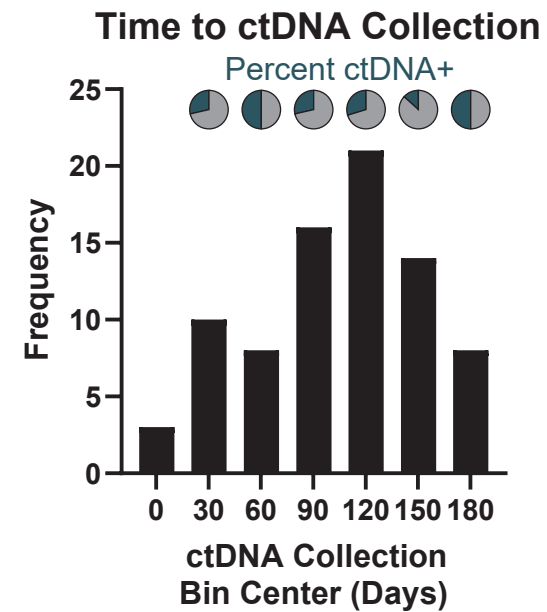

e

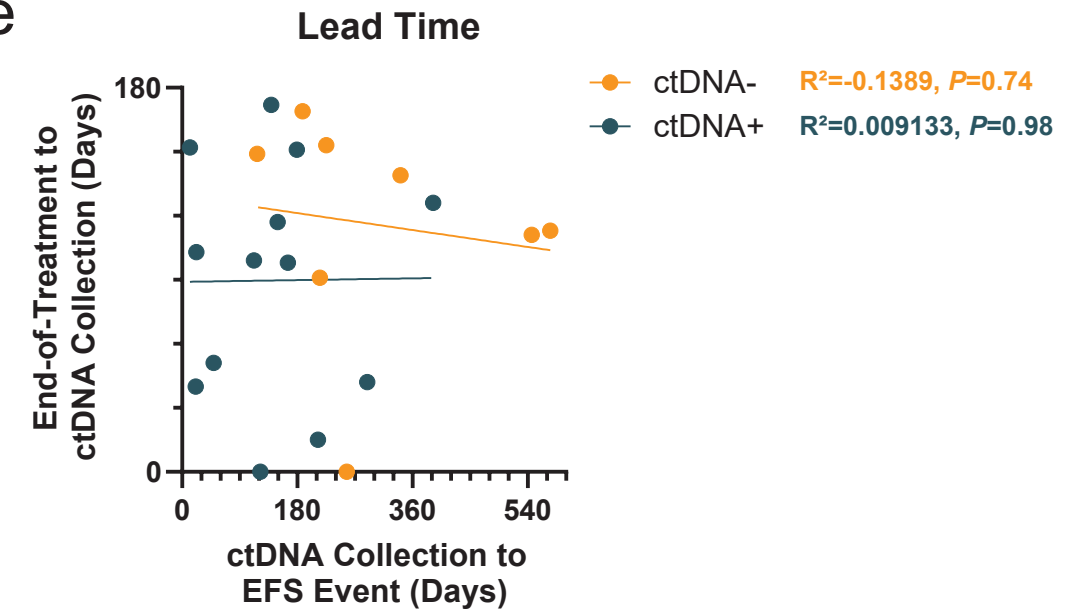

(a) REMARK diagram. (b) ctDNA positivity rates by VAF thresholds ranging from 1-5%. (c) Comparison of EFS by ctDNA status using VAF thresholds of 1-5%. *P* value is log-rank. (d) Histogram showing temporal distribution of end-of-treatment ctDNA collection. Pie charts show the percent of patients within that 30-day bin who were found to be ctDNA+. (e) Association between end-of-treatment to ctDNA assessment interval and ctDNA assessment to EFS event interval in amongst patients who experienced recurrence. *R*<sup>2</sup> and *P* reflect Pearson correlation coefficient and significance, respectively.

# Supplementary Figure 2

a

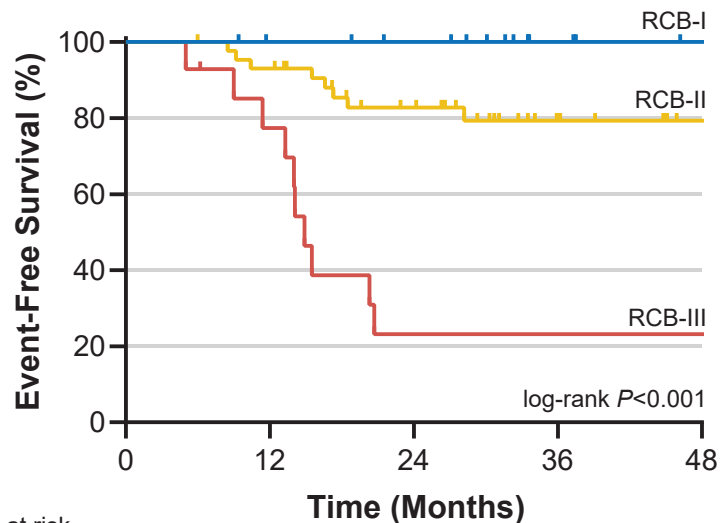

| No. at risk | 0  | 12 | 24 | 36 | 48 |
|-------------|----|----|----|----|----|
| RCB-I       | 21 | 20 | 18 | 10 | 7  |
| RCB-II      | 44 | 41 | 29 | 16 | 10 |
| RCB-III     | 14 | 11 | 4  | 4  | 4  |

b

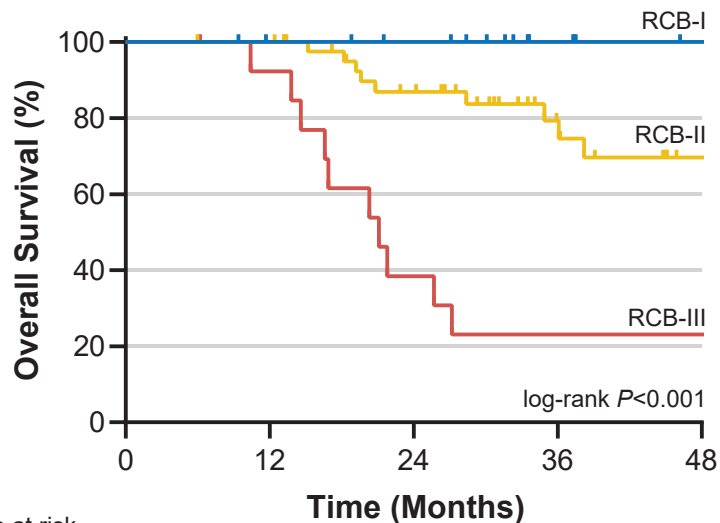

| No. at risk | 0  | 12 | 24 | 36 | 48 |
|-------------|----|----|----|----|----|
| RCB-I       | 21 | 20 | 18 | 10 | 7  |
| RCB-II      | 44 | 44 | 32 | 18 | 10 |
| RCB-III     | 14 | 13 | 6  | 4  | 4  |

(a) EFS among RCB-I, RCB-II, and RCB-III classes. (b) OS among RCB-I, RCB-II, and RCB-III classes.  $P$  is log-rank statistic.
